# Supplementary material for: Synthesis of NiFe-layered double hydroxides using triethanolamine-complexed precursors as oxygen evolution reaction catalysts: effects of Fe valence
Source: Royal Society of Chemistry journal article supplement (doi:10.1039/d3dt03373b), 2024-01-01
Supplement: d3dt03373b1.pdf [file d3dt03373b1.pdf]

## Supplementary information

### **Synthesis of NiFe-layered double hydroxides using triethanolamine-complexed precursors as oxygen evolution reaction catalysts: Effects of Fe valence**

Guoqiang Luo <sup>a, b</sup>, Haoran Feng <sup>a, b</sup>, Ruizhi Zhang <sup>b</sup>, Yingqiu Zheng <sup>a, \*</sup>,  
Rong Tu <sup>a, b</sup>, Qiang Shen <sup>b</sup>

<sup>a</sup> *Chaozhou Branch of Chemistry and Chemical Engineering Guangdong  
Laboratory, Chaozhou 521000, China*

<sup>b</sup> *State Key Lab of Advanced Technology for Materials Synthesis and  
Processing, Wuhan University of Technology, Wuhan 430070, China*

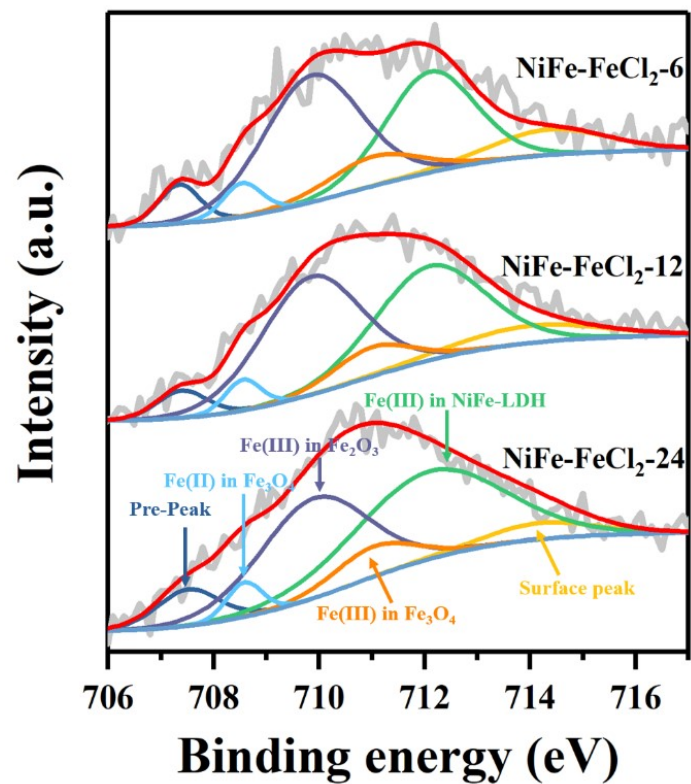

**Fig. S1 High-resolution XPS spectra of the Fe 2p<sub>3/2</sub> regions in the NiFe–FeCl<sub>2</sub>-x (x = 6, 12, and 24) samples.**
